# Supplementary material for: Kinetics of cytokine receptor trafficking determine signaling and functional selectivity
Source: eLife journal article supplement (doi:10.7554/elife.49314), 2019-11-27
Supplement: supp [file elife-49314-supp-v1.zip]

a)

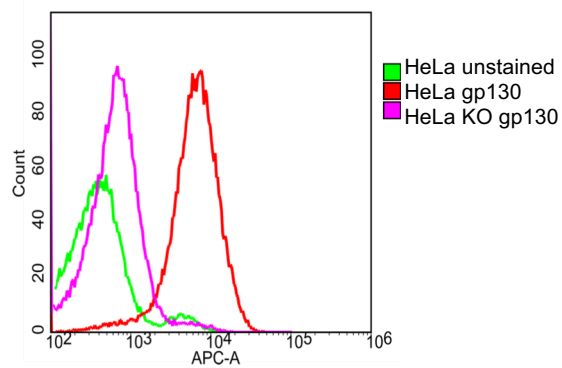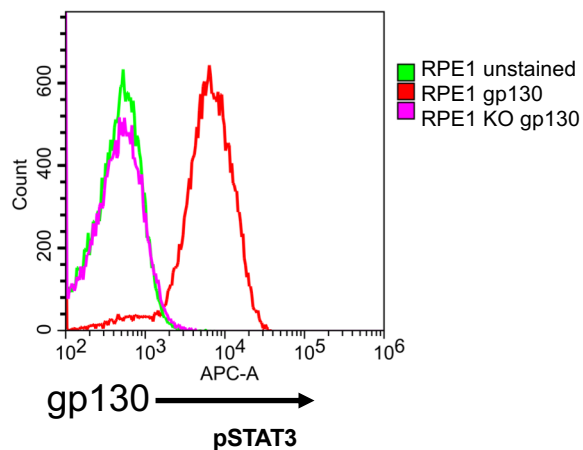

b)

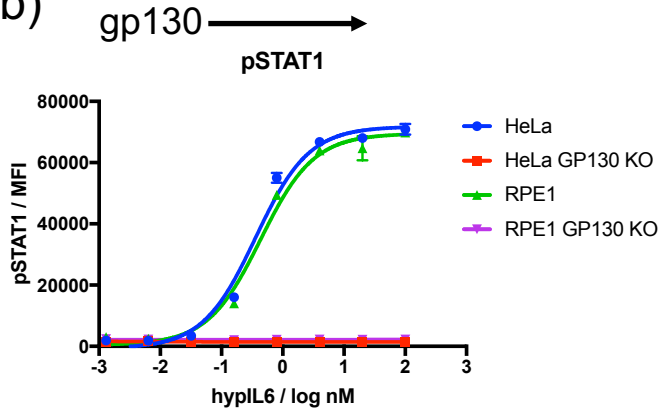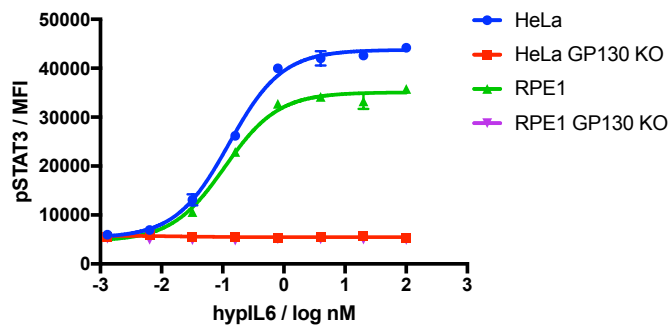

c)

Channel Rho11

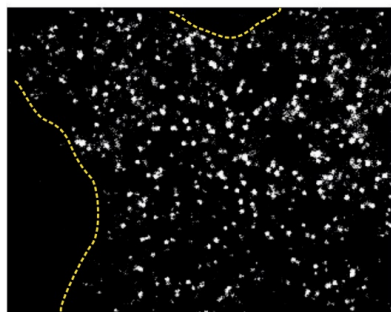

Channel DY647

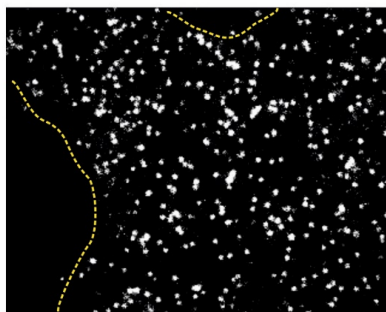

Trajectories Rho11

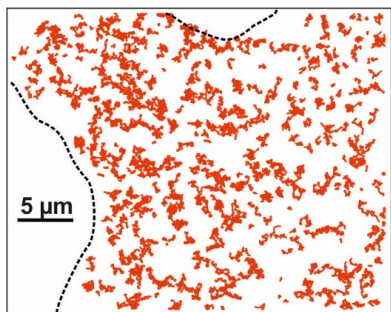

Trajectories DY647

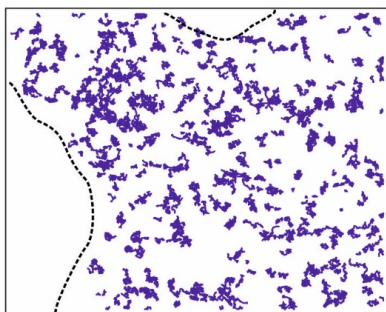

Co-trajectories

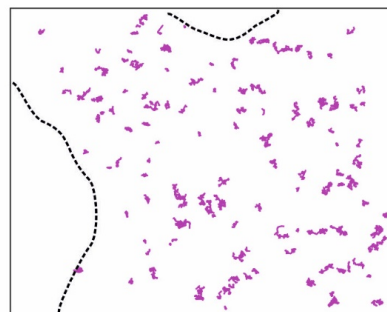

Figure 3 – Supplementary Figure 1
