# Supplementary material for: Kinetics of cytokine receptor trafficking determine signaling and functional selectivity
Source: eLife journal article supplement (doi:10.7554/elife.49314), 2019-11-27
Supplement: supp1 [file elife-49314-supp1-v2.pdf]

| Gene Name      | Transcript Length (base pairs, bp) | Number of STAT3 binding sites | Location of STAT3 binding         |
|----------------|------------------------------------|-------------------------------|-----------------------------------|
| <b>SOCS3</b>   | 3,300                              | 4                             | promoter and down-stream enhancer |
| <b>BCL3</b>    | 11,498                             | 4                             | promoter and intergenic           |
| <b>SBNO2</b>   | 66,648                             | 1                             | intergenic                        |
| <b>ZBED2</b>   | 110,364                            | 1                             | up-stream enhancer                |
| <b>MUC1</b>    | 7,092                              | 1                             | promoter                          |
| <b>GZMB</b>    | 3,314                              | 1                             | promoter                          |
| <b>PDCD1</b>   | 9,028                              | 2                             | promoter and down-stream enhancer |
| <b>SLC19A1</b> | 46,211                             | 1                             | up-stream enhancer                |
| <b>SREBF1</b>  | 24,930                             | 1                             | up-stream enhancer                |
| <b>BCL6</b>    | 24,351                             | 1                             | promoter                          |
| <b>JAK3</b>    | 23,247                             | 2                             | promoter and intergenic           |
| <b>MXD1</b>    | 27,898                             | N/A                           |                                   |
| <b>PIM2</b>    | 5,843                              | 3                             | promoter                          |
| <b>SOCS1</b>   | 1,775                              | 1                             | down-stream enhancer              |
| <b>CMTM8</b>   | 131,647                            | 1                             | intergenic                        |
| <b>PIM1</b>    | 5,224                              | 1                             | Down-stream enhancer              |
| <b>PARP9</b>   | 36,654                             | 1                             | intergenic                        |
| <b>LDLR</b>    | 42,802                             | 1                             | promoter                          |
| <b>IFI30</b>   | 4,451                              | N/A                           |                                   |
| <b>CNP</b>     | 10,991                             | 1                             | promoter                          |
| <b>IFITM1</b>  | 1,767                              | 1                             | promoter                          |
| <b>ANK3</b>    | 705,090                            | 1                             | promoter                          |
| <b>GIMAP5</b>  | 21,394                             | 1                             | down-stream enhancer              |
| <b>NELL2</b>   | 368,097                            | N/A                           |                                   |
