# Supplementary figures and images for: Kinetics of cytokine receptor trafficking determine signaling and functional selectivity
Source: eLife journal article supplement (doi:10.7554/elife.49314), 2019-11-27

a)

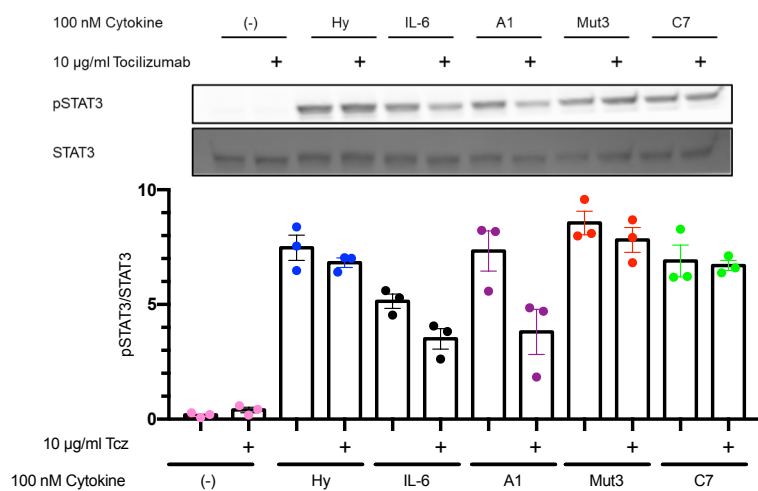

b)

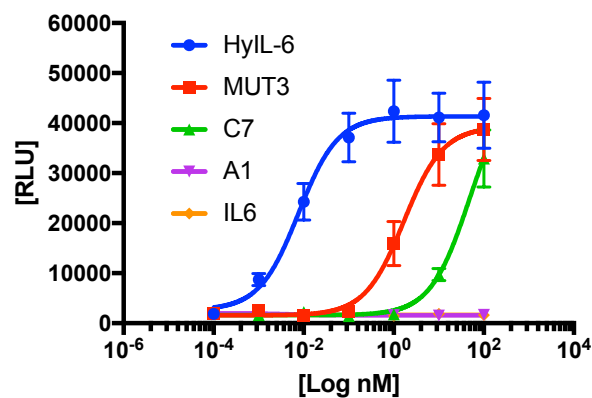

c)

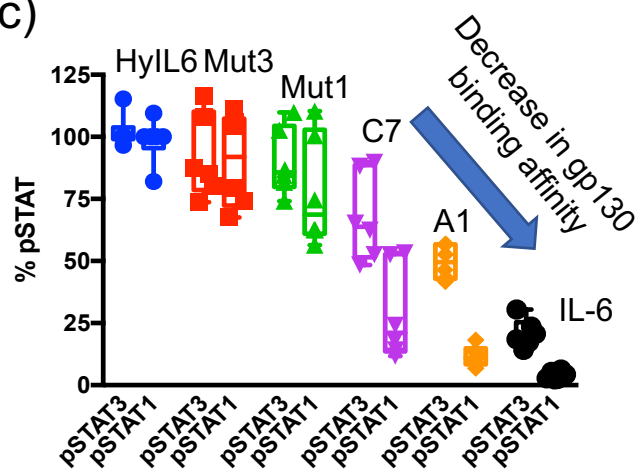

Figure 2 – Supplementary Figure 1

Supplement: supp [file elife-49314-supp-v1.zip]

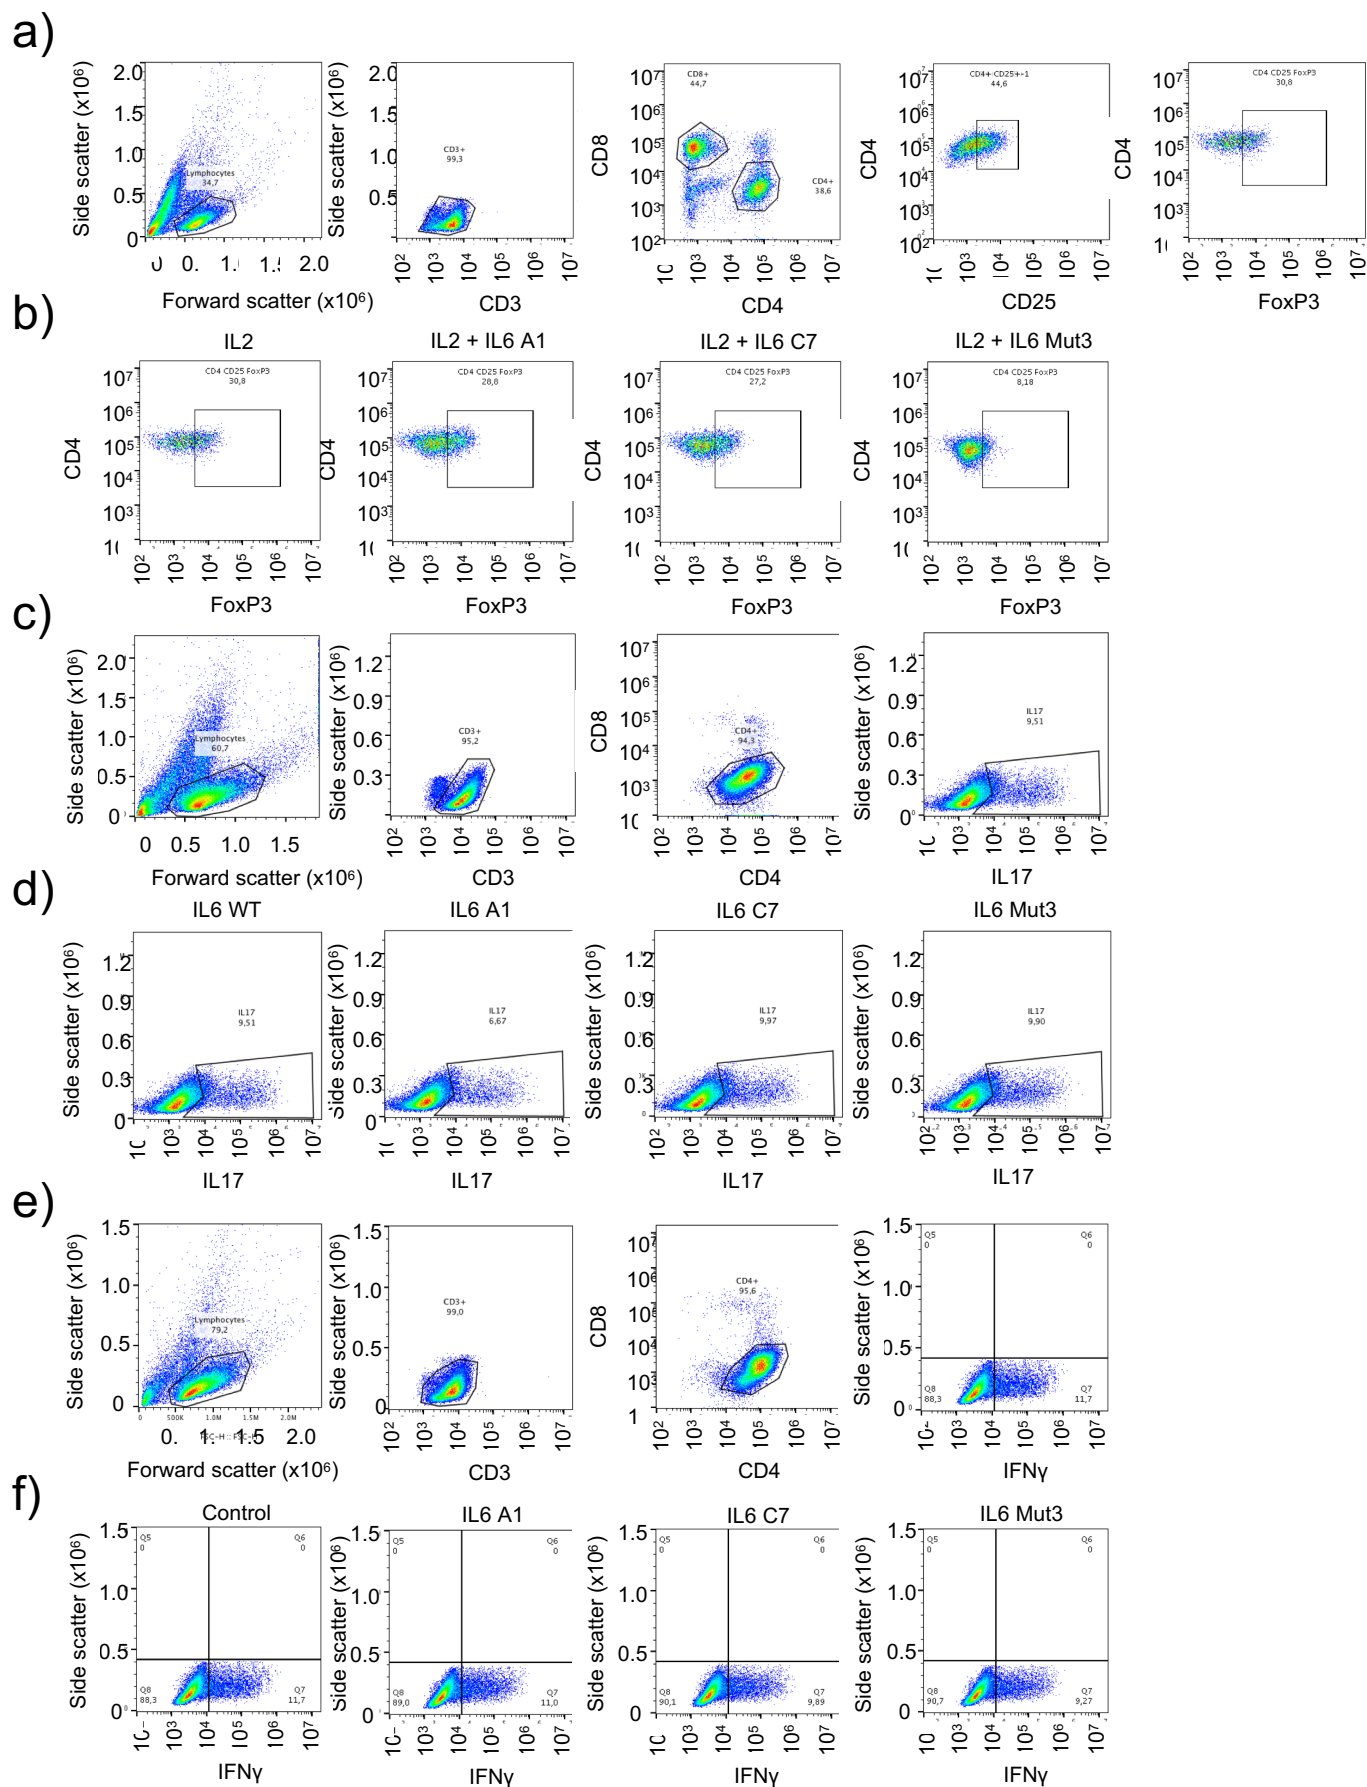

Figure 7 – Supplementary Figure 1

Supplement: supp [file elife-49314-supp-v1.zip]

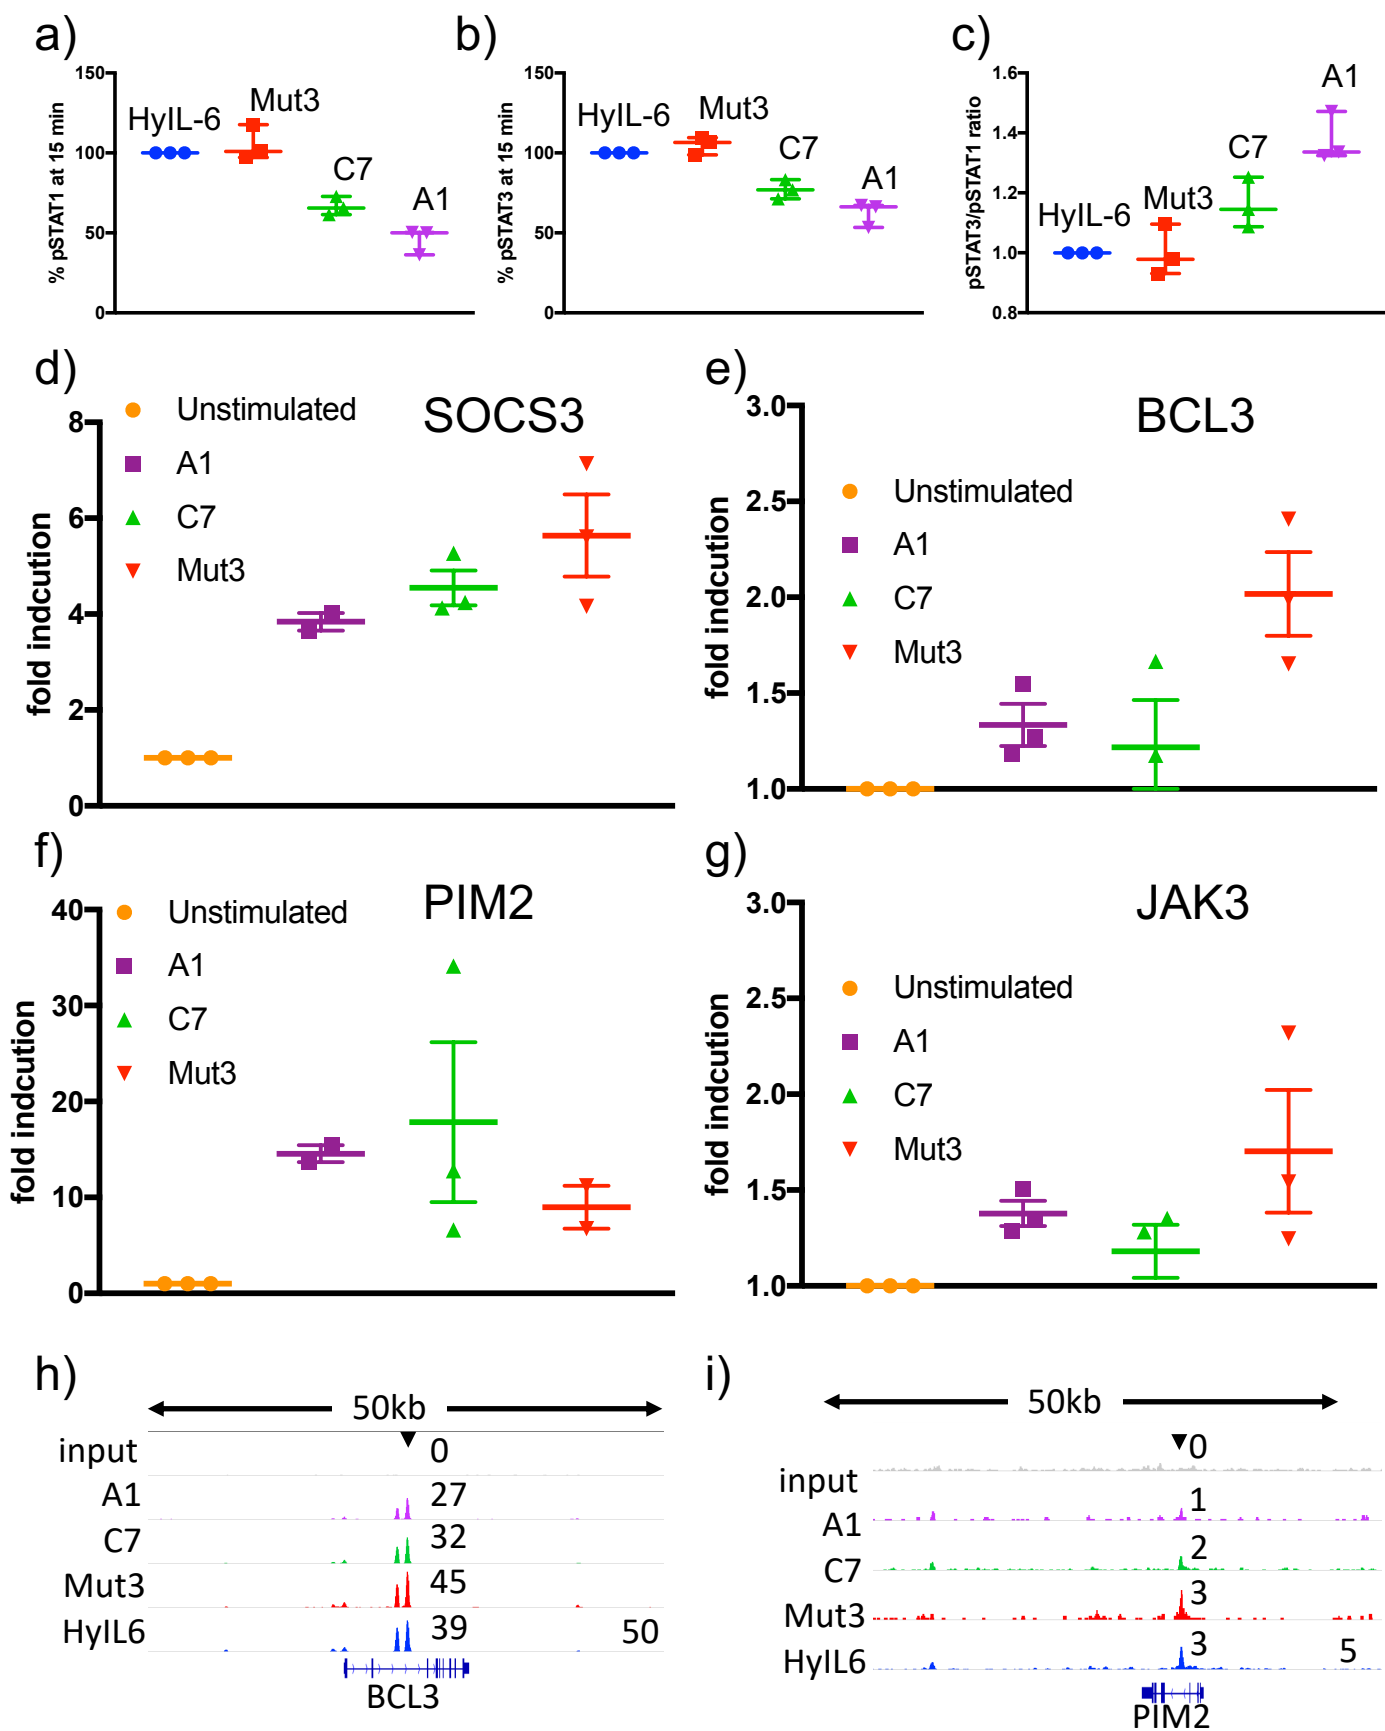

Figure 6 – Supplementary Figure 1

Supplement: supp [file elife-49314-supp-v1.zip]

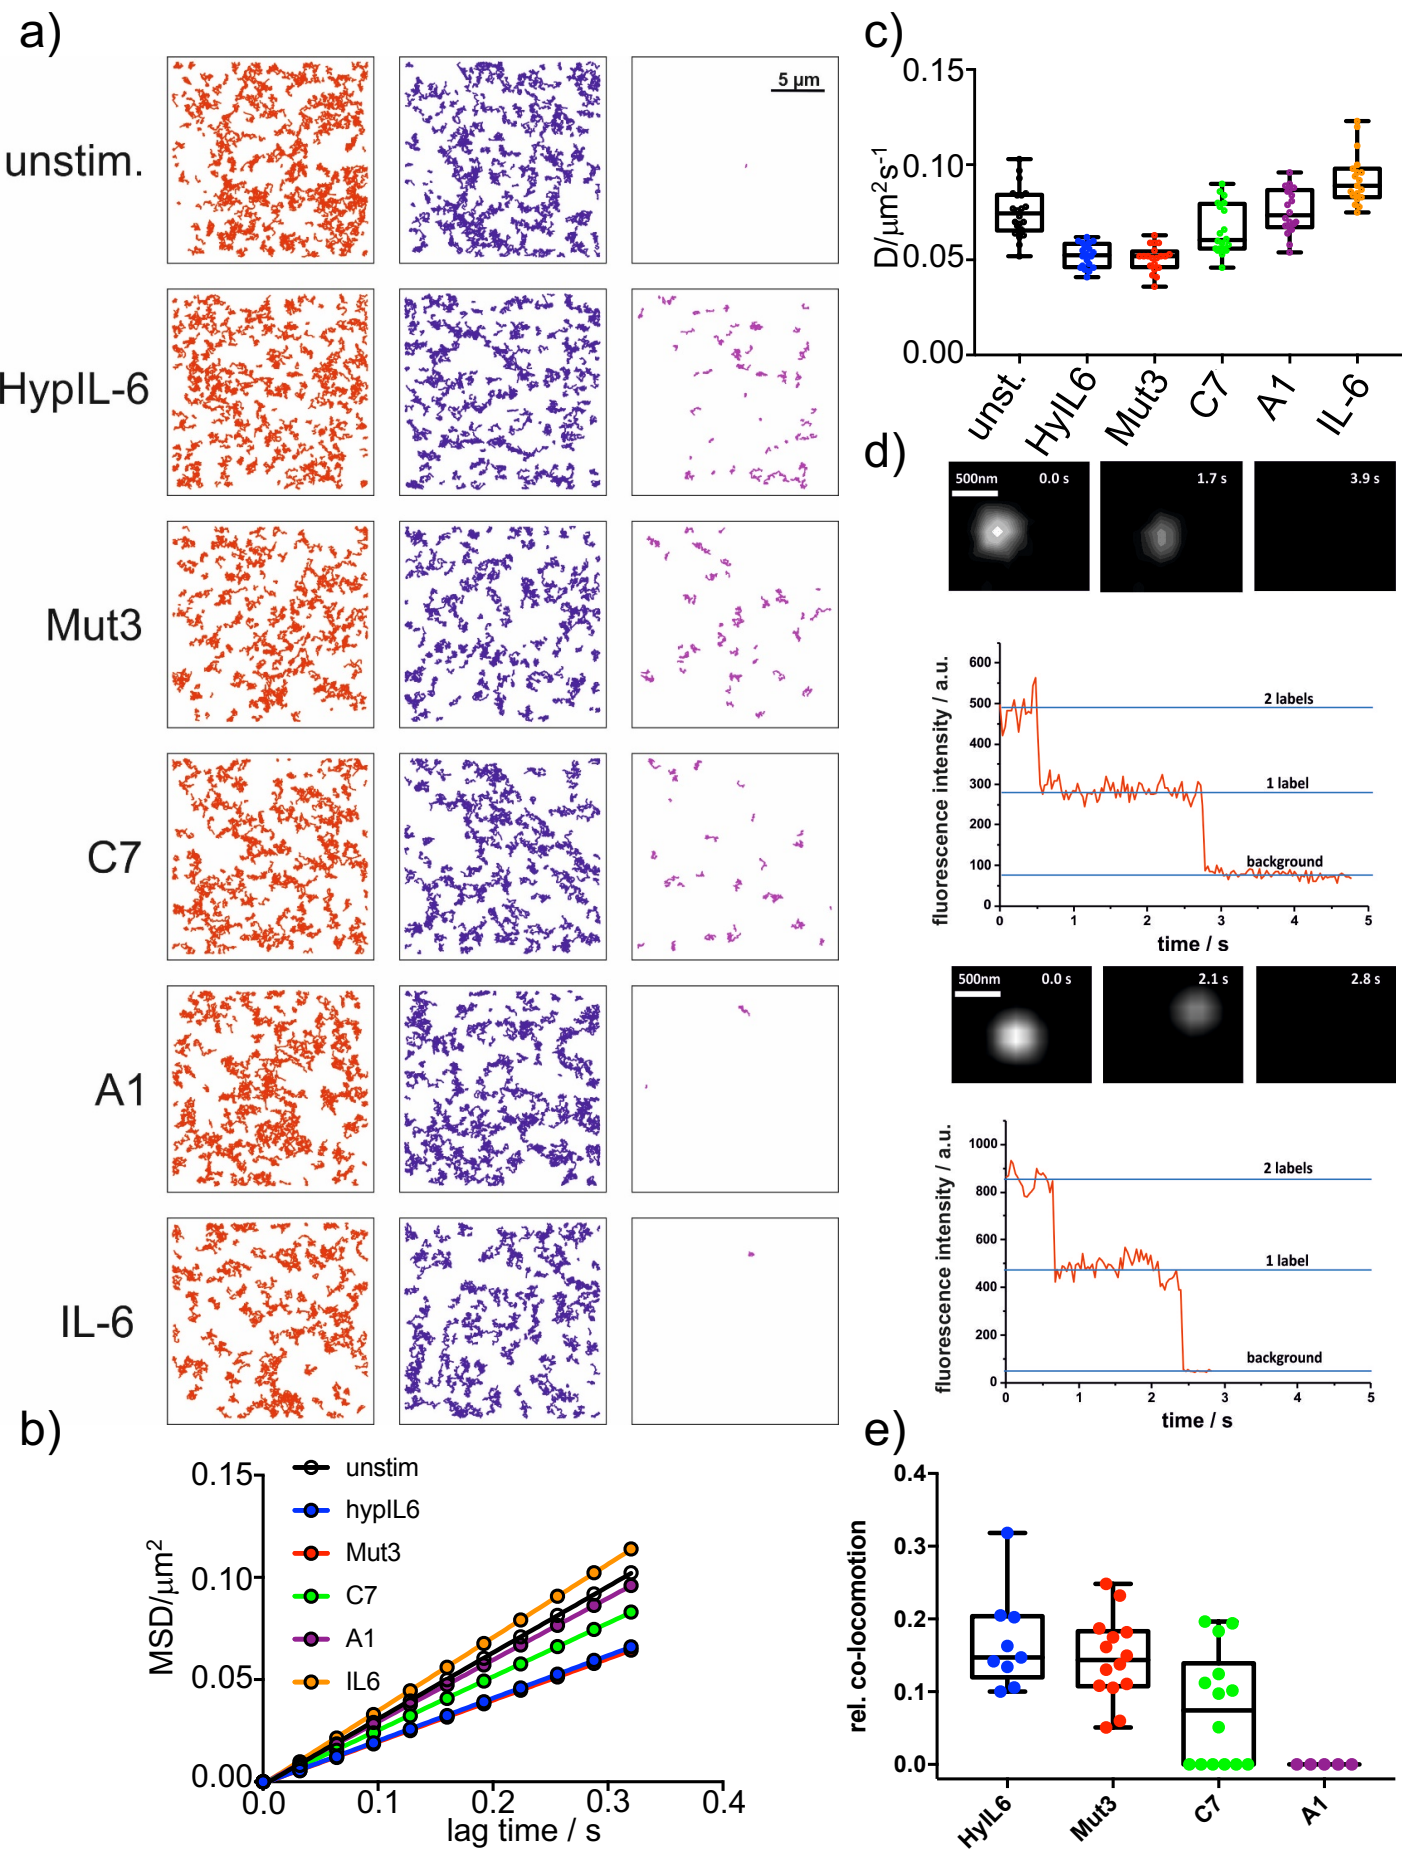

Figure 3 – Supplementary Figure 2

Supplement: supp [file elife-49314-supp-v1.zip]

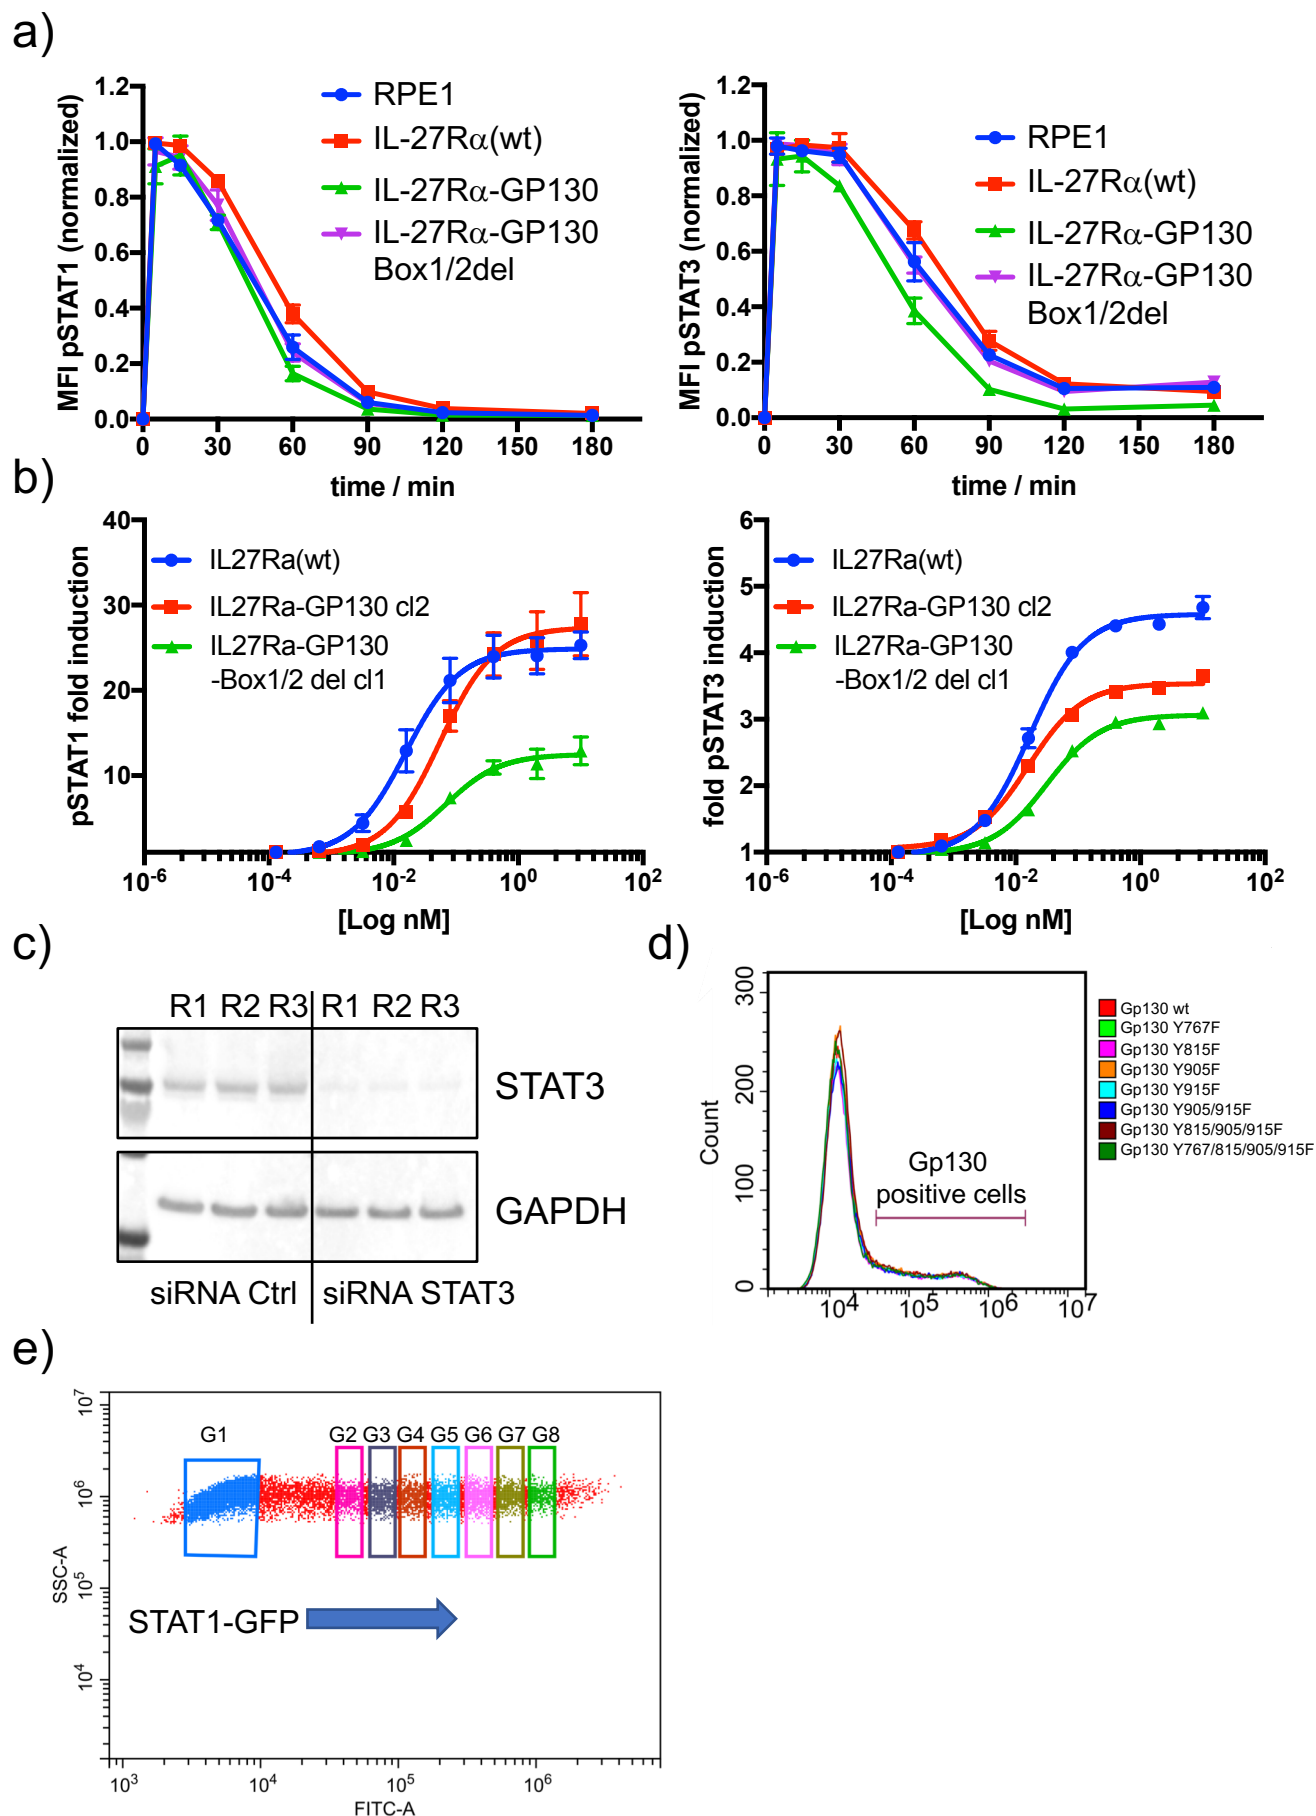

Figure 5 – Supplementary Figure 1

Supplement: supp [file elife-49314-supp-v1.zip]

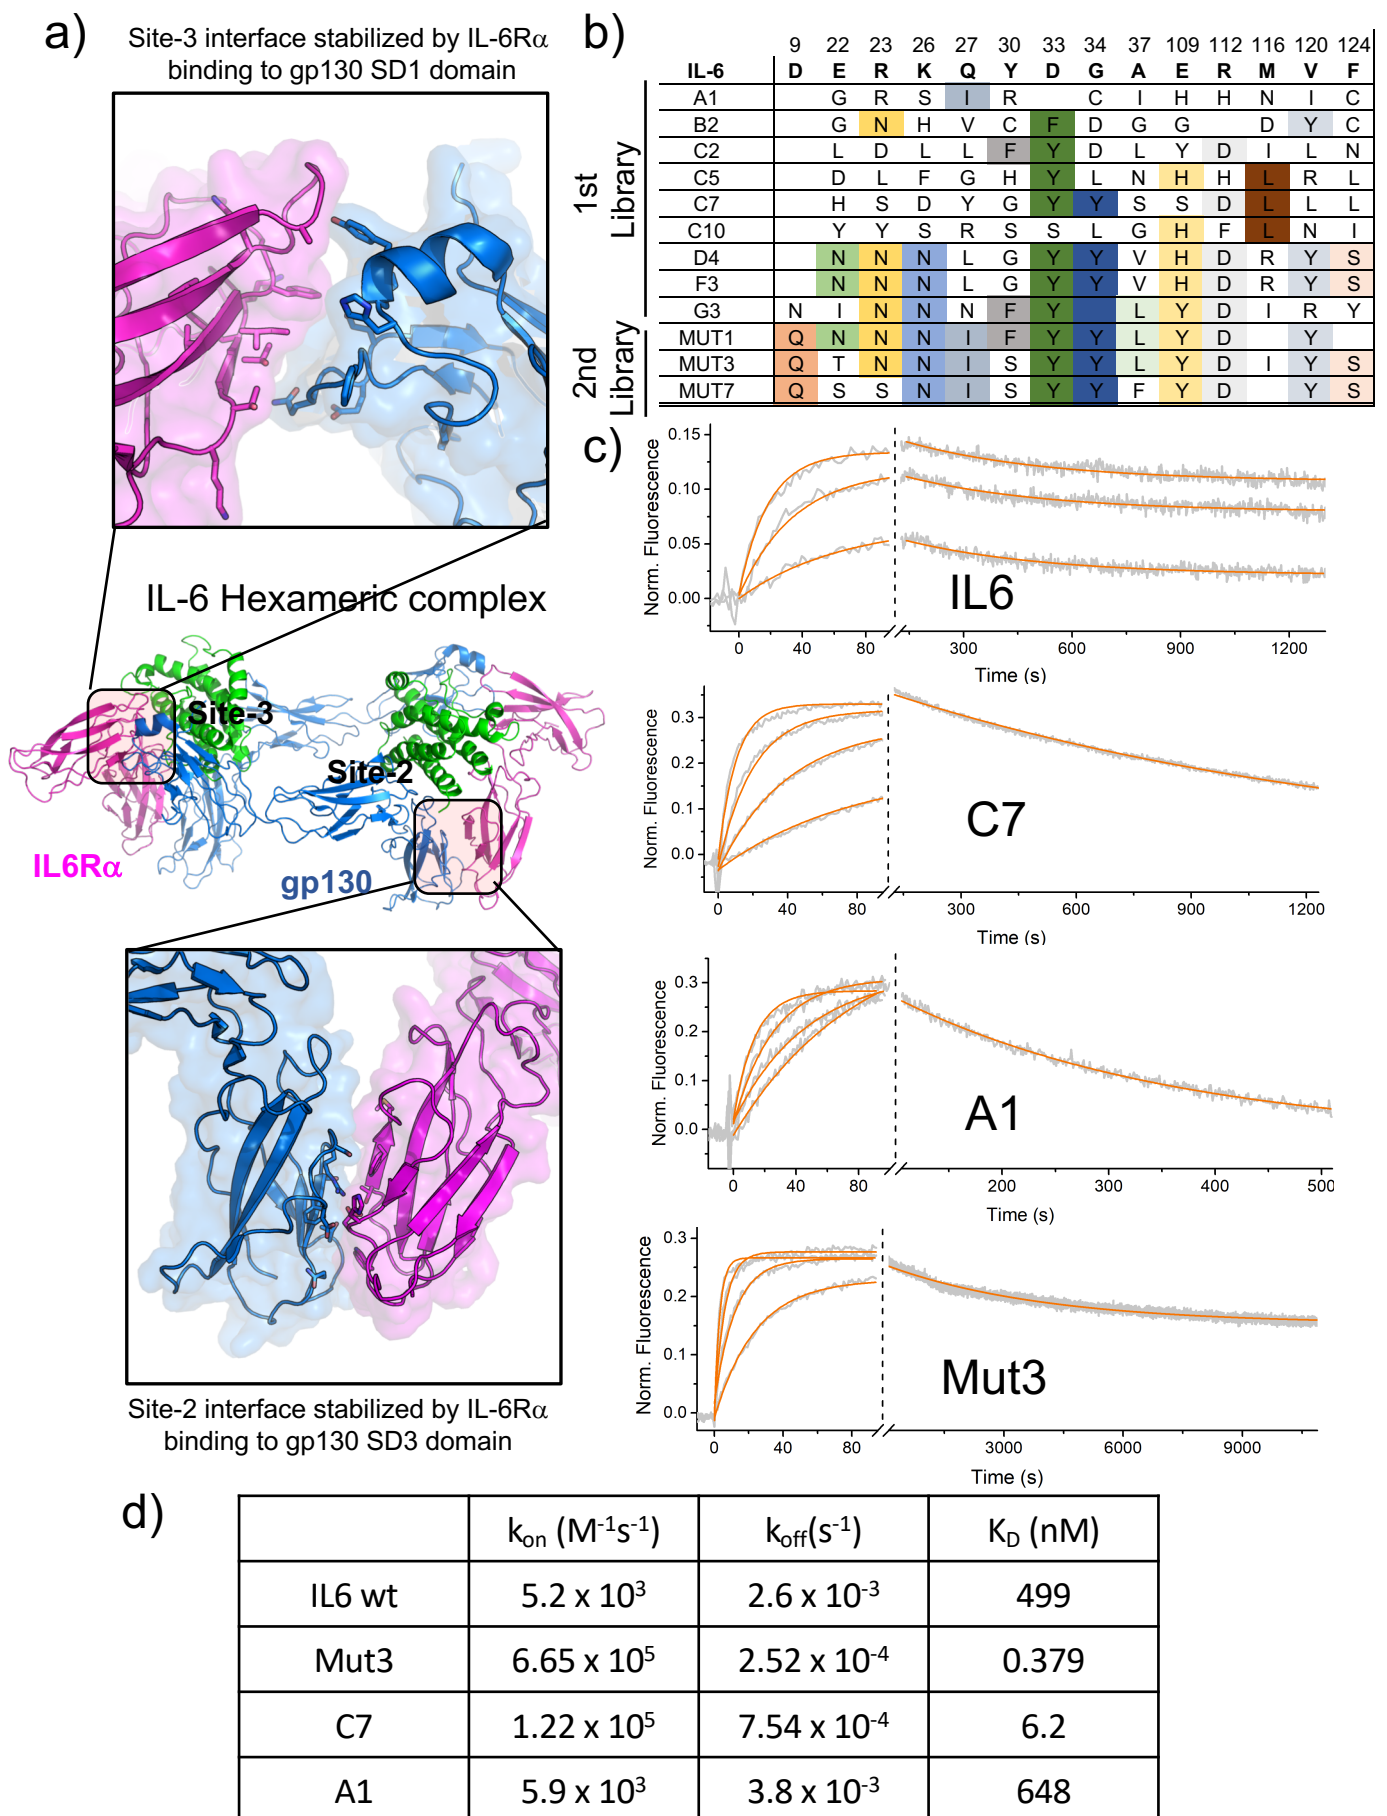

Figure 1 – Supplementary Figure 1

Supplement: supp [file elife-49314-supp-v1.zip]

a)

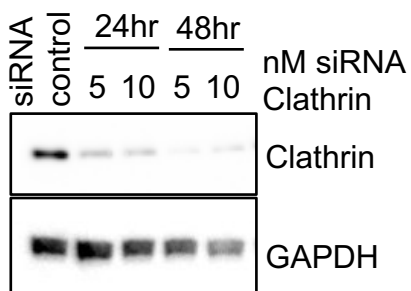

b)

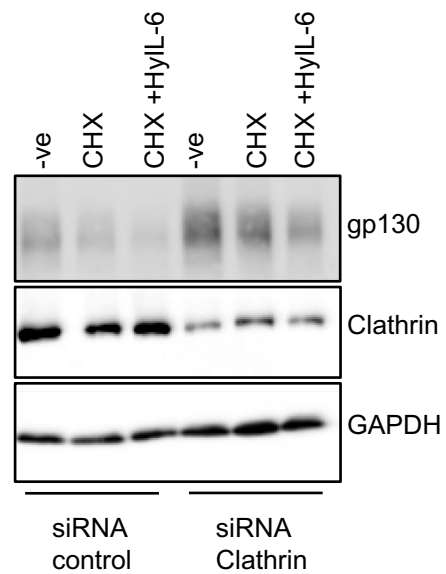

Figure 4 – Supplementary Figure 1

Supplement: supp [file elife-49314-supp-v1.zip]
